# Supplementary material for: Heterogeneity of Fractional Anisotropy and Mean Diffusivity Measurements by In Vivo Diffusion Tensor Imaging in Normal Human Hearts
Source: PLoS One. 2015 Jul 15;10(7):e0132360. doi: 10.1371/journal.pone.0132360 (PMC4503691; doi:10.1371/journal.pone.0132360)
Supplement: S1 File — (XLSX) [file pone.0132360.s001.xlsx]

## Sheet: Global
FA	MD	E1	E2	E3	SNR
0.45286	0.8553	0.001304	0.000766	0.000496	16.3828
0.42146	0.92139	0.001344	0.000881	0.000539	10.9895
0.39606	0.78668	0.001118	0.000772	0.00047	9.6105
0.42495	0.9205	0.001354	0.00086	0.000548	13.2414
0.40253	0.91606	0.001324	0.000867	0.000558	12.3001
0.42078	0.7978	0.001157	0.000776	0.00046	13.3082
0.3455	0.98394	0.001319	0.001008	0.000625	14.0672
0.41586	0.82433	0.001207	0.000765	0.000501	13.6014
0.43233	0.85495	0.001281	0.000766	0.000518	14.6308
0.48222	0.84317	0.001296	0.000796	0.000438	15.5201
0.41076	0.9004	0.001294	0.000889	0.000518	14.8726
0.41091	0.84101	0.001216	0.000806	0.000501	10.0811
0.47468	0.80624	0.001253	0.000699	0.000466	11.6735
0.407	0.94033	0.001361	0.000887	0.000573	9.631
0.41084	0.90012	0.001294	0.000884	0.000523	11.4327
0.37539	0.86162	0.001191	0.000873	0.000521	12.4444
0.41503	0.87818	0.001286	0.000817	0.000532	13.4338
0.46356	0.88507	0.001325	0.000841	0.000488	16.3952
0.38668	1.0129	0.001406	0.001024	0.000609	17.036
0.3631	0.9768	0.001346	0.000961	0.000623	13.1822

## Sheet: Transmural
FA			MD			E1			E2			E3			SNR
Endocardium	Mesocardium	Epicardium	Endocardium	Mesocardium	Epicardium	Endocardium	Mesocardium	Epicardium	Endocardium	Mesocardium	Epicardium	Endocardium	Mesocardium	Epicardium	Endocardium	Mesocardium	Epicardium
0.47608	0.51456	0.37349	0.84231	0.83895	0.88192	0.001313	0.001357	0.001247	0.000743	0.000727	0.000822	0.000471	0.000433	0.000577	15.9353	17.5126	15.6431
0.37284	0.43848	0.44443	0.98804	0.95672	0.83252	0.00138	0.001417	0.001244	0.000949	0.000911	0.000796	0.000636	0.000542	0.000458	12.2376	11.6366	9.3396
0.37192	0.42608	0.38544	0.83195	0.79374	0.74727	0.001146	0.001155	0.001064	0.00084	0.000784	0.000711	0.00051	0.000443	0.000467	9.9573	10.4062	8.6145
0.39749	0.46303	0.40972	0.99986	0.91409	0.86487	0.001409	0.001394	0.001273	0.001	0.000835	0.000773	0.00059	0.000513	0.000548	13.9795	13.115	12.7881
0.40708	0.44493	0.35769	0.94174	0.9068	0.9044	0.001362	0.001358	0.001262	0.000905	0.000858	0.000844	0.000559	0.000505	0.000608	12.947	14.2668	9.8695
0.42991	0.4691	0.36726	0.77174	0.79619	0.81975	0.001114	0.001205	0.001146	0.000783	0.000773	0.000774	0.000418	0.000411	0.00054	13.7364	15.3416	11.0211
0.35895	0.38599	0.29761	0.97734	0.98813	0.98466	0.001296	0.00136	0.001298	0.001053	0.001034	0.00095	0.000584	0.000571	0.000705	15.0299	15.712	11.826
0.34742	0.47648	0.41117	0.85584	0.82966	0.79373	0.00116	0.001278	0.001175	0.000836	0.000766	0.000707	0.000571	0.000446	0.0005	13.5002	13.5422	13.7412
0.43025	0.47399	0.39245	0.84378	0.84516	0.87357	0.001254	0.001311	0.001272	0.00078	0.000759	0.000762	0.000497	0.000466	0.000586	14.8098	14.9405	14.1802
0.46791	0.49703	0.47872	0.83531	0.87258	0.82054	0.001235	0.001362	0.001279	0.000859	0.000819	0.000725	0.000412	0.000437	0.000457	14.373	16.7384	15.209
0.38386	0.45768	0.38576	0.94917	0.89539	0.86954	0.001313	0.001327	0.001248	0.000979	0.000905	0.000809	0.000556	0.000454	0.000552	14.9737	16.1813	13.5529
0.37949	0.43966	0.40824	0.89051	0.84987	0.79284	0.001237	0.001262	0.001156	0.000892	0.000805	0.000737	0.000543	0.000482	0.000485	9.998	10.7566	9.4943
0.462	0.50666	0.45198	0.75621	0.8447	0.80653	0.001155	0.001361	0.00122	0.000666	0.000718	0.000707	0.000447	0.000455	0.000492	9.3671	14.5723	10.5344
0.33337	0.45652	0.41711	1.0197	0.9543	0.86305	0.001369	0.001453	0.001265	0.00101	0.00086	0.000816	0.000681	0.00055	0.000508	9.5639	10.8831	8.4503
0.39083	0.45998	0.38011	0.93099	0.90942	0.86663	0.001297	0.001359	0.001229	0.000954	0.000901	0.000812	0.000542	0.000468	0.000559	10.9435	13.6156	9.7486
0.34687	0.42593	0.34984	0.8799	0.89199	0.82019	0.001182	0.001275	0.001121	0.0009	0.000925	0.000804	0.000558	0.000475	0.000536	11.5767	13.6606	11.963
0.38508	0.46666	0.38861	0.89162	0.84183	0.9026	0.001268	0.001287	0.001297	0.000851	0.000783	0.000823	0.000555	0.000455	0.000587	12.9915	15.2599	12.0295
0.45342	0.52191	0.41496	0.91921	0.83434	0.90755	0.001343	0.001321	0.001317	0.000887	0.000804	0.000842	0.000528	0.000379	0.000564	15.2185	19.5057	14.3005
0.37701	0.40341	0.37782	1.0458	1.0346	0.96814	0.001403	0.001452	0.001363	0.001134	0.001076	0.000894	0.0006	0.000576	0.000648	16.4562	18.6551	15.919
0.38078	0.40265	0.31216	0.96418	0.9659	0.99661	0.001344	0.001377	0.001318	0.000961	0.000956	0.000966	0.000587	0.000565	0.000706	13.6871	14.2191	11.8159

## Sheet: Regional
FA				MD				E1				E2				E3				SNR
Anterior	Lateral	Inferior	Septal	Anterior	Lateral	Inferior	Septal	Anterior	Lateral	Inferior	Septal	Anterior	Lateral	Inferior	Septal	Anterior	Lateral	Inferior	Septal	Anterior	Lateral	Inferior	Septal
0.44506	0.43687	0.45931	0.47339	0.86933	0.85814	0.81546	0.89102	0.00131	0.001294	0.001246	0.001395	0.000805	0.00075	0.000746	0.000769	0.000494	0.00053	0.000455	0.00051	18.9154	11.7031	13.6812	23.2366
0.3507	0.36373	0.4846	0.46954	1.0564	0.88815	0.81407	0.95488	0.001462	0.001208	0.001273	0.001453	0.000994	0.000895	0.000746	0.000919	0.000713	0.000561	0.000422	0.000493	11.548	10.7788	9.2785	12.678
0.42934	0.34527	0.36245	0.44625	0.8125	0.79771	0.69236	0.85049	0.001166	0.001086	0.000951	0.001277	0.000832	0.000779	0.000691	0.000792	0.000439	0.000528	0.000435	0.000482	8.8564	9.6612	8.2232	11.7341
0.3993	0.37988	0.46563	0.45589	0.95876	0.91307	0.84549	0.98496	0.001369	0.0013	0.001271	0.001513	0.00091	0.00084	0.000831	0.000865	0.000597	0.000599	0.000435	0.000576	12.4458	12.0569	12.3808	16.7063
0.38004	0.41106	0.38383	0.44809	0.91288	0.94224	0.90101	0.90703	0.00129	0.001366	0.001279	0.001379	0.000874	0.000902	0.000857	0.000823	0.000575	0.000559	0.000567	0.000519	11.7523	9.7118	12.665	16.0946
0.40168	0.40478	0.434	0.43455	0.77474	0.80625	0.79672	0.80838	0.001093	0.00115	0.001167	0.001201	0.000792	0.000789	0.000771	0.000758	0.000439	0.00048	0.000451	0.000466	12.0182	10.7846	13.535	16.4404
0.32962	0.3481	0.34957	0.35014	0.9737	0.98535	0.96791	1.0136	0.001286	0.001323	0.001294	0.00138	0.001012	0.001013	0.001004	0.001001	0.000623	0.00062	0.000606	0.000659	17.6868	12.7235	11.8525	15.7636
0.40371	0.38264	0.44401	0.43383	0.92161	0.81293	0.75185	0.84918	0.001348	0.001135	0.00113	0.001279	0.000822	0.00081	0.00069	0.000754	0.000595	0.000494	0.000436	0.000515	14.0355	13.0208	11.8181	16.0498
0.40694	0.40168	0.45329	0.46054	0.89179	0.85369	0.8107	0.89139	0.00131	0.001233	0.00124	0.001375	0.000794	0.000794	0.000712	0.000791	0.000571	0.000534	0.00048	0.000508	13.8873	12.7724	12.4516	20.8615
0.44557	0.50811	0.49707	0.46367	0.8432	0.78929	0.84549	0.90329	0.001264	0.001228	0.001313	0.001381	0.000778	0.000764	0.000808	0.000831	0.000488	0.000375	0.000415	0.000499	15.7867	13.3646	14.1854	19.8358
0.40527	0.4036	0.40322	0.43389	0.93583	0.84633	0.92244	0.90074	0.001325	0.001215	0.001322	0.001318	0.00096	0.000825	0.000896	0.000889	0.000522	0.000499	0.000549	0.000496	16.1492	12.1493	14.1829	17.7126
0.38116	0.36674	0.44382	0.44422	0.92122	0.78825	0.76219	0.90096	0.001292	0.001101	0.00112	0.001358	0.000904	0.000754	0.000755	0.00082	0.000568	0.000509	0.000412	0.000525	10.8556	8.954	8.7489	11.8279
0.44025	0.45367	0.49847	0.51456	0.86814	0.82655	0.74438	0.77786	0.001298	0.00126	0.001191	0.001261	0.000783	0.000725	0.000626	0.000651	0.000523	0.000494	0.000416	0.000421	13.5333	10.4819	9.2289	13.7413
0.37528	0.38898	0.41456	0.45999	1.0727	0.88716	0.85731	0.9775	0.001515	0.001262	0.00124	0.001493	0.001002	0.000867	0.000827	0.000866	0.000701	0.000533	0.000505	0.000573	11.687	9.3894	7.7245	10.2005
0.40578	0.41795	0.42172	0.39925	0.93178	0.84127	0.87051	0.95563	0.001337	0.001217	0.001247	0.00137	0.000906	0.000825	0.000893	0.000918	0.000552	0.000482	0.000471	0.000579	9.7511	10.6235	11.9068	14.1638
0.37579	0.36473	0.35233	0.41455	0.83184	0.85598	0.86659	0.89426	0.001127	0.001183	0.001168	0.001298	0.000883	0.000851	0.000891	0.000865	0.000485	0.000535	0.00054	0.00052	13.1258	10.8966	12.234	13.7087
0.39924	0.37813	0.43774	0.43565	0.94943	0.88089	0.78646	0.90342	0.001368	0.001244	0.001176	0.001354	0.000896	0.000828	0.000726	0.000827	0.000584	0.00057	0.000458	0.000529	14.1814	11.2497	12.3574	15.5692
0.45291	0.5135	0.44659	0.43931	0.95942	0.76394	0.87731	0.94086	0.001401	0.001215	0.001308	0.001377	0.000984	0.000674	0.000806	0.000902	0.000493	0.000402	0.000518	0.000543	16.9049	14.2837	16.2102	18.1294
0.45716	0.35112	0.33935	0.4006	0.99245	0.94902	1.0505	1.0459	0.001426	0.001286	0.001437	0.001455	0.001049	0.000953	0.000996	0.001088	0.000503	0.000608	0.000719	0.000595	20.2767	13.0801	12.9529	21.5274
0.35756	0.33451	0.36953	0.40858	1.0115	1.0669	0.862	0.94692	0.001372	0.001444	0.00118	0.001388	0.001039	0.001033	0.000871	0.000866	0.000623	0.000723	0.000536	0.000587	17.4101	11.4755	9.2191	15.914
